# Supplementary material for: Reliability and Validity of Assessing User Satisfaction With Web-Based Health Interventions
Source: PubMed Central journal article supplement (PMC5023944; doi:10.2196/jmir.5952), 2016-08-31
Supplement: jmir_v18i8e234_app1.pdf [file jmir_v18i8e234_app1.pdf]

Table 3 (extended) - Tests of invariance for the proposed one-factor structure of the Client Satisfaction Questionnaire adapted to Internet-based interventions between sample 1 (N = 174) and sample 2 (N = 111): results of multigroup confirmatory factor analyses with MLR estimator.

| Model                        | $\chi^2$ | $df^a$ | $\chi^2/df$ | CFI <sup>b</sup> | RMSEA <sup>c</sup> | SRMR <sup>d</sup> | Comparison | $\Delta\chi^2 (df)$ | <i>P</i> | $\Delta$ CFI | $\Delta$ RMSEA | $\Delta$ SRMR |
|------------------------------|----------|--------|-------------|------------------|--------------------|-------------------|------------|---------------------|----------|--------------|----------------|---------------|
| M1 configural invariance     | 99.2     | 40     | 2.5         | .964             | .102               | .031              |            |                     |          |              |                |               |
| M2 weak invariance           | 104.5    | 47     | 2.2         | .965             | .093               | .043              | M1-M2      | 4.7 (7)             | .70      | -.001        | .009           | .012          |
| M3 strong invariance         | 120.2    | 54     | 2.2         | .959             | .093               | .048              | M2-M3      | 15.7 (7)            | .03      | -.006        | .001           | .005          |
| M4 partial strong invariance | 111.3    | 53     | 2.1         | .964             | .088               | .045              | M2-M4      | 5.9 (6)             | .43      | -.001        | .005           | .002          |

<sup>a</sup>*df*: degrees of freedom.

<sup>b</sup>CFI: comparative fit index.

<sup>c</sup>RMSEA: root-mean-square error of approximation.

<sup>d</sup>SRMR: standardized root-mean-square residual.
